# Supplementary material for: PCR-based detection of Plasmodium in Anopheles mosquitoes: a comparison of a new high-throughput assay with existing methods
Source: Malar J. 2008 Sep 15;7:177. doi: 10.1186/1475-2875-7-177 (PMC2553798; doi:10.1186/1475-2875-7-177)
Supplement: Additional file 1 — Excel spreadsheet showing the full results of the trial of PCR methods for detection of P. falciparum using artificially infected An. stephensi mosquitoes. Mosquito samples that had no exposure to P. falciparum and buffer negative controls are highlighted in grey. A P. falciparum positive result is indicated by (Pf+) and a negative result by (-). [file 1475-2875-7-177-S1.xls]

## Sheet: Sheet1
Well ID	Sample no	Detection method
		Dissection	Taqman	Snounou nested	Tassanakajon	Snounou single
A1	67	-	Pf+	Pf+	-	-
B1	68	-	Pf+	Pf+	Pf+	-
C1	69	-	Pf+	Pf+	-	-
D1	1	Pf+	Pf+	Pf+	Pf+	-
E1	70	-	Pf+	Pf+	Pf+	-
F1	71	-	-	-	-	-
G1	2	Pf+	Pf+	Pf+	Pf+	-
H1	37	-	-	-	-	-
A2	3	Pf+	Pf+	Pf+	Pf+	-
B2	52	-	-	-	-	-
C2	72	-	Pf+	Pf+	Pf+	-
D2	53	-	Pf+	Pf+	Pf+	-
E2	4	Pf+	Pf+	Pf+	Pf+	-
F2	5	Pf+	Pf+	Pf+	Pf+	-
G2	84	mosquito neg control	-	-	-	-
H2	6	Pf+	Pf+	Pf+	-	-
A3	7	Pf+	Pf+	Pf+	Pf+	-
B3	8	Pf+	Pf+	Pf+	Pf+	-
C3	38	-	-	-	-	-
D3	9	Pf+	Pf+	Pf+	Pf+	-
E3	10	Pf+	Pf+	Pf+	Pf+	-
F3	96	water control	-	-	-	-
G3	11	Pf+	Pf+	Pf+	Pf+	-
H3	12	Pf+	-	-	-	-
A4	85	mosquito neg control	-	-	-	-
B4	86	mosquito neg control	-	-	-	-
C4	13	Pf+	Pf+	Pf+	Pf+	-
D4	14	Pf+	Pf+	Pf+	Pf+	-
E4	39	-	-	-	-	-
F4	40	-	-	-	-	-
G4	15	Pf+	Pf+	Pf+	Pf+	-
H4	54	-	-	-	-	-
A5	16	Pf+	Pf+	Pf+	-	-
B5	41	-	-	-	-	-
C5	17	Pf+	Pf+	Pf+	Pf+	-
D5	42	-	-	-	-	-
E5	18	Pf+	Pf+	Pf+	-	-
F5	43	-	-	-	-	-
G5	19	Pf+	Pf+	Pf+	Pf+	-
H5	80	-	Pf+	-	-	-
A6	92	mosquito neg control	-	-	-	-
B6	93	mosquito neg control	-	-	-	-
C6	81	-	-	-	-	-
D6	82	-	Pf+	Pf+	Pf+	-
E6	83	-	-	-	-	-
F6	20	Pf+	Pf+	-	Pf+	-
G6	44	-	-	-	-	-
H6	45	-	-	-	-	-
A7	46	-	-	-	-	-
B7	21	Pf+	Pf+	Pf+	Pf+	-
C7	22	Pf+	Pf+	Pf+	Pf+	-
D7	23	Pf+	Pf+	Pf+	-	-
E7	47	-	-	-	-	-
F7	48	-	-	-	-	-
G7	49	-	-	-	-	-
H7	50	-	-	-	-	-
A8	24	Pf+	Pf+	Pf+	Pf+	-
B8	25	Pf+	Pf+	Pf+	Pf+	-
C8	26	Pf+	Pf+	-	Pf+	-
D8	51	-	-	-	-	-
E8	27	Pf+	Pf+	Pf+	Pf+	-
F8	87	mosquito neg control	-	-	-	-
G8	28	Pf+	Pf+	Pf+	Pf+	-
H8	55	-	-	-	-	-
A9	56	-	Pf+	Pf+	Pf+	-
B9	57	-	-	-	-	-
C9	58	-	-	-	-	-
D9	29	Pf+	Pf+	Pf+	Pf+	-
E9	88	mosquito neg control	-	-	-	-
F9	59	-	-	-	-	-
G9	60	-	-	-	-	-
H9	30	Pf+	Pf+	Pf+	-	-
A10	61	-	Pf+	-	Pf+	-
B10	31	Pf+	Pf+	Pf+	Pf+	-
C10	89	mosquito neg control	-	-	-	-
D10	90	-	-	-	-	-
E10	91	mosquito neg control	-	-	-	-
F10	32	Pf+	Pf+	Pf+	Pf+	-
G10	63	-	-	-	-	-
H10	33	Pf+	Pf+	Pf+	Pf+	-
A11	34	Pf+	Pf+	Pf+	Pf+	-
B11	62	-	-	-	-	-
C11	35	Pf+	Pf+	Pf+	Pf+	-
D11	64	-	-	-	-	-
E11	36	Pf+	Pf+	Pf+	Pf+	-
F11	65	-	-	-	-	-
G11	66	-	-	-	-	-
H11	76	-	-	-	-	-
A12	77	-	-	-	-	-
B12	78	-	-	-	-	-
C12	79	-	-	-	-	-
D12	94	mosquito neg control	-	-	-	-
E12	95	water control	-	-	-	-
F12	73	-	Pf+	Pf+	-	-
G12	74	-	Pf+	Pf+	Pf+	-
H12	75	-	-	-	-	-
